# Supplementary material
Source: PubMed Central journal article supplement (PMC7531337)
Supplement: mmc1.pdf [file mmc1.pdf]

**MEDJ, Volume 2**

## **Supplemental Information**

### **Kidney Function Indicators Predict**

### **Adverse Outcomes of COVID-19**

**Ye-Mao Liu, Jing Xie, Ming-Ming Chen, Xiao Zhang, Xu Cheng, Haomiao Li, Feng Zhou, Juan-Juan Qin, Fang Lei, Ze Chen, Lijin Lin, Chengzhang Yang, Weiming Mao, Guohua Chen, Haofeng Lu, Xigang Xia, Daihong Wang, Xiaofeng Liao, Jun Yang, Xiaodong Huang, Bing-Hong Zhang, Yufeng Yuan, Jingjing Cai, Xiao-Jing Zhang, Yibin Wang, Xin Zhang, Zhi-Gang She, and Hongliang Li**

# **Kidney function indicators predict adverse outcomes of COVID-19**

By YM Liu, J Xie, MM Chen, et al.

## **Supplemental Information**

**Figure S1. Loess curves for renal indicator trajectories in COVID-19 patients based on sex.**

**Table S1. The Normal Range of BUN, Scr, and BUA in study hospitals.**

**Table S1. The Normal Range of BUN, Scr, and BUA in study hospitals, related to Table 1.**

| Hospital site | BUN(mmol/l) |         | Scr( $\mu$ mol/l) |            | BUA( $\mu$ mol/l) |             |
|---------------|-------------|---------|-------------------|------------|-------------------|-------------|
|               | Male        | Female  | Male              | Female     | Male              | Female      |
| 1             | 2.8-7.6     | 2.8-7.6 | 64.0-104.0        | 49.0-90.0  | 208.0-428.0       | 155.0-357.0 |
| 2             | 3.1-8.0     | 2.6-7.5 | 57.0-97.0         | 41.0-73.0  | 208.0-428.0       | 155.0-357.0 |
| 3             | 3.1-7.2     | 3.1-7.2 | 40.0-105.0        | 40.0-105.0 | 150.0-430.0       | 150.0-430.0 |
| 4             | 3.1-8.0     | 2.6-7.5 | 57.0-97.0         | 41.0-73.0  | 202.0-416.0       | 142.0-339.0 |
| 5             | 2.8-8.1     | 2.8-8.1 | 57.0-97.0         | 41.0-73.0  | 208.0-428.0       | 155.0-357.0 |
| 6             | 3.1-8.0     | 2.6-7.5 | 57.0-97.0         | 41.0-73.0  | 142.0-428.0       | 142.0-428.0 |
| 7             | 2.8-7.6     | 2.8-7.6 | 64.0-104.0        | 49.0-90.0  | 208.0-428.0       | 156.0-357.0 |
| 8             | 2.5-7.1     | 2.5-7.1 | 53.0-106.0        | 53.0-106.0 | 208.0-428.0       | 208.0-428.0 |
| 9             | 1.7-8.2     | 1.7-8.2 | 38.0-120.0        | 38.0-120.0 | 202.0-428.0       | 142.0-339.0 |
| 10            | 2.9-8.2     | 2.9-8.2 | 53.0-123.0        | 44.0-106.0 | 208.0-428.0       | 155.0-357.0 |
| 11            | 3.1-8.0     | 3.1-8.0 | 57.0-97.0         | 57.0-97.0  | 142.0-428.0       | 142.0-428.0 |
| 12            | 3.1-8.0     | 2.6-7.5 | 57.0-97.0         | 41.0-73.0  | 208.0-428.0       | 155.0-357.0 |
| 13            | 1.8-7.0     | 1.8-7.0 | 44.0-106.0        | 44.0-106.0 | 91.0-420.0        | 91.0-420.0  |
| 14            | 1.7-8.0     | 1.7-7.5 | 57.0-111.0        | 41.0-81.0  | 208.0-428.0       | 155.0-357.0 |
| 15            | 3.1-8.0     | 3.1-8.0 | 57.0-97.0         | 41.0-73.0  | 202.0-416.0       | 142.0-339.0 |
| 16            | 3.1-8.0     | 2.6-7.5 | 59.0-104.0        | 45.0-84.0  | 202.3-416.5       | 142.8-339.2 |
| 17            | 3.2-7.1     | 2.5-6.1 | 53.0-123.0        | 44.0-106.0 | 208.0-428.0       | 155.0-357.0 |

**Abbreviations:** BUN, Blood urea nitrogen; Scr, Serum creatinine; BUA, Blood uric acid;
